# Supplementary material for: DRB1–environment interactions in multiple sclerosis etiology: results from two Swedish case–control studies
Source: PubMed Central journal article supplement — J Neurol Neurosurg Psychiatry. 2021 Mar 9;92(7):717–22. doi: 10.1136/jnnp-2020-325676 (PMC8223646; doi:10.1136/jnnp-2020-325676), 2021-03-09
Supplement: jnnp-2020-325676supp001.pdf [file jnnp-2020-325676supp001.pdf]

**eTable 1.** Number of cases and controls in EIMS and GEMS.

| Study |          | Included in the study | HLA genotype available | Datasets for analysis         |                                             |                                     |
|-------|----------|-----------------------|------------------------|-------------------------------|---------------------------------------------|-------------------------------------|
|       |          |                       |                        | Data on genotype and smoking. | Data on genotype and EBNA-1 antibody levels | Data on genotype and adolescent BMI |
| EIMS  | Cases    | 2880                  | 2070                   | 2070                          | 986                                         | 1968                                |
|       | Controls | 6122                  | 2899                   | 2899                          | 1417                                        | 2783                                |
| GEMS  | Cases    | 6085                  | 5161                   | 5161                          | 4284                                        | 5017                                |
|       | Controls | 5357                  | 3833                   | 3833                          | 3770                                        | 3786                                |
| Total | Cases    | 8965                  | 7231                   | 7231                          | 5270                                        | 6985                                |
|       | Controls | 11479                 | 6732                   | 6732                          | 5187                                        | 6569                                |

**eTable 2.** OR with 95% CI of developing MS among subjects categorized by *HLA-DRB1\*15:01* and smoking habits. N=7231 cases and 6732 controls.

| <i>DRB1*15:01</i> | Smoking | ca/co <sup>a</sup> | OR (95% CI) <sup>b</sup> | OR (95% CI) <sup>c</sup> | AP (95% CI)    | Exponentiated interaction term <sup>d</sup> |
|-------------------|---------|--------------------|--------------------------|--------------------------|----------------|---------------------------------------------|
| 0                 | -       | 1326/2572          | 1.0 (reference)          | 1.0 (reference)          |                |                                             |
| 0                 | +       | 1767/2258          | 1.5 (1.4-1.7)            | 1.5 (1.4-1.7)            |                |                                             |
| 1                 | -       | 1525/904           | 3.3 (3.0-3.7)            | 3.9 (3.4-4.4)            |                |                                             |
| 1                 | +       | 1881/815           | 4.5 (4.1-5.1)            | 5.6 (4.9-6.3)            | 0.3 (0.2-0.4)  | 0.9 (0.8-1.1)                               |
| 2                 | -       | 364/106            | 6.7 (5.4-8.6)            | 8.3 (6.5-10.8)           |                |                                             |
| 2                 | +       | 368/77             | 9.1 (7.1-11.9)           | 11.6 (8.8-15.3)          | 0.3 (0.02-0.6) | 0.9 (0.7-1.3)                               |

<sup>a</sup>number of exposed cases and controls; <sup>b</sup>adjusted for study, age, sex, residential area, and ancestry;

<sup>c</sup>adjusted for study, age, sex, residential area, ancestry, EBNA1 status, adolescent BMI, rs9277565, rs2229092, *DRB1\*03:01*, *DRB1\*13:03*, *DRB1\*08:01*, *A\*02:01*, *B\*44:02*, *B\*38:01*, *B\*55:01*,

*DQA1\*01:01*, *DQB1\*03:02*, and *DQB1\*03:01*. Homozygote correction for *DRB1\*03:01* and *A\*02:01*.

AP=attributable proportion due to interaction. <sup>d</sup>interaction term related to multiplicative interaction.

**eTable 3.** OR with 95% CI of developing MS among subjects categorized by *HLA-DRB1\*15:01* and EBNA-1 status. N=5270 cases and 5187 controls.

| <i>DRB1*15:01</i> | Anti-EBNA-1 IgG | ca/co <sup>a</sup> | OR (95% CI) <sup>b</sup> | OR (95% CI) <sup>c</sup> | AP (95% CI)   | Exponentiated interaction term |
|-------------------|-----------------|--------------------|--------------------------|--------------------------|---------------|--------------------------------|
| 0                 | Low             | 693/1955           | 1.0 (reference)          | 1.0 (reference)          |               |                                |
| 0                 | High            | 1474/1747          | 2.5 (2.2-2.8)            | 2.6 (2.3-2.9)            |               |                                |
| 1                 | Low             | 514/584            | 2.5 (2.1-2.9)            | 3.2 (2.7-3.8)            |               |                                |
| 1                 | High            | 2033/758           | 8.0 (7.0-9.0)            | 10.0 (8.6-11.5)          | 0.5 (0.4-0.6) | 1.0 (0.8-1.2)                  |
| 2                 | Low             | 111/56             | 5.6 (4.0-7.8)            | 7.7 (5.4-11.0)           |               |                                |
| 2                 | High            | 445/87             | 15.2 (11.8-19.4)         | 19.5 (14.8-25.6)         | 0.5 (0.4-0.7) | 1.0 (0.7-1.5)                  |

<sup>a</sup>number of exposed cases and controls; <sup>b</sup>adjusted for study, age, sex, residential area, and ancestry;

<sup>c</sup>adjusted for study, age, sex, residential area, ancestry, smoking, adolescent BMI, rs9277565,

rs2229092, *DRB1\*03:01*, *DRB1\*13:03*, *DRB1\*08:01*, *A\*02:01*, *B\*44:02*, *B\*38:01*, *B\*55:01*,

*DQA1\*01:01*, *DQB1\*03:02*, and *DQB1\*03:01*. Homozygote correction for *DRB1\*03:01* and *A\*02:01*.

AP=attributable proportion due to interaction. <sup>d</sup>interaction term related to multiplicative interaction.

**eTable 4.** OR with 95% CI of developing MS among subjects categorized by HLA-DRB1\*15:01 and adolescent BMI status. N=6985 cases and 6569 controls.

| DRB1*15:01 | Adolescent BMI | ca/co <sup>a</sup> | OR (95% CI) <sup>b</sup> | OR (95% CI) <sup>c</sup> | AP (95% CI)    | Exponentiated interaction term |
|------------|----------------|--------------------|--------------------------|--------------------------|----------------|--------------------------------|
| 0          | ≤25            | 2584/4252          | 1.0 (reference)          | 1.0 (reference)          |                |                                |
| 0          | >25            | 392/467            | 1.4 (1.2-1.6)            | 1.4 (1.2-1.6)            |                |                                |
| 1          | ≤25            | 2851/1509          | 3.1 (2.9-3.4)            | 3.7 (3.3-4.1)            |                |                                |
| 1          | >25            | 450/164            | 4.7 (3.9-5.6)            | 5.4 (4.4-6.7)            | 0.3 (0.1-0.4)  | 0.9 (0.8-1.1)                  |
| 2          | ≤25            | 621/162            | 6.2 (5.2-7.5)            | 8.1 (6.5-10.0)           |                |                                |
| 2          | >25            | 87/15              | 10.0 (5.7-17.3)          | 12.5 (6.9-21.6)          | 0.3 (-0.1-0.7) | 0.9 (0.6-1.3)                  |

<sup>a</sup>number of exposed cases and controls; <sup>b</sup>adjusted for study, age, sex, residential area, and ancestry;

<sup>c</sup>adjusted for study, age, sex, residential area, ancestry, smoking, EBNA1 status, rs9277565,

rs2229092, *DRB1\*03:01*, *DRB1\*13:03*, *DRB1\*08:01*, *A\*02:01*, *B\*44:02*, *B\*38:01*, *B\*55:01*,

*DQA1\*01:01*, *DQB1\*03:02*, and *DQB1\*03:01*. Homozygote correction for *DRB1\*03:01* and *A\*02:01*.

AP=attributable proportion due to interaction. <sup>d</sup>interaction term related to multiplicative interaction.

Participants with age <20 years at the index year were excluded.

**eTable 5.** OR with 95% CI of developing MS among subjects categorized by DRB1\*15:01, HLA-A\*02:01, and smoking.

| DRB1*15:01 | A*02:01 | Smoking | ca/co <sup>a</sup> | OR (95% CI) <sup>b</sup> | OR (95% CI) <sup>c</sup> |
|------------|---------|---------|--------------------|--------------------------|--------------------------|
| 0          | 1-2     | -       | 510/1402           | 1.0 (reference)          | 1.0 (reference)          |
| 0          | 0       | -       | 816/1170           | 2.0 (1.7-2.3)            | 1.8 (1.6-2.1)            |
| 1          | 1-2     | -       | 655/501            | 3.6 (3.1-4.2)            | 4.0 (3.3-4.8)            |
| 1          | 0       | -       | 870/403            | 6.0 (5.1-7.0)            | 6.8 (5.7-8.2)            |
| 2          | 1-2     | -       | 173/57             | 8.3 (6.0-11.4)           | 10.9 (7.6-15.4)          |
| 2          | 0       | -       | 191/49             | 10.9 (7.8-15.3)          | 12.6 (8.7-18.2)          |
| 0          | 1-2     | -       | 722/1217           | 1.6 (1.4-1.9)            | 1.6 (1.4-1.9)            |
| 0          | 0       | +       | 1045/1041          | 2.8 (2.4-3.2)            | 2.6 (2.2-3.0)            |
| 1          | 1-2     | +       | 865/473            | 5.1 (4.4-5.9)            | 5.7 (4.8-6.7)            |
| 1          | 0       | +       | 1016/342           | 8.2 (7.0-9.6)            | 9.3 (7.7-11.1)           |
| 2          | 1-2     | +       | 175/48             | 9.8 (7.0-13.8)           | 11.5 (8.0-16.5)          |
| 2          | 0       | +       | 193/29             | 18.0 (12.0-27.0)         | 20.0 (13.1-30.5)         |

<sup>a</sup>number of exposed cases and controls; <sup>b</sup>adjusted for study, age, sex, residential area, and ancestry;

<sup>c</sup>adjusted for study, age, sex, residential area, ancestry, EBNA-1 status, adolescent BMI, rs9277565, rs2229092, DRB1\*03:01, DRB1\*13:03, DRB1\*08:01, B\*44:02, B\*38:01, B\*55:01, DQA1\*01:01, DQB1\*03:02, and DQB1\*03:01. Homozygote correction for DRB1\*03:01 and A\*02:01.

**eTable 6.** OR with 95% CI of developing MS among subjects categorized by DRB1\*15:01, A\*02:01 status, and EBNA-1 status.

| DRB1*15:01 | A*02:01 | Anti-EBNA-1 IgG | ca/co <sup>a</sup> | OR (95% CI) <sup>b</sup> | OR (95% CI) <sup>c</sup> |
|------------|---------|-----------------|--------------------|--------------------------|--------------------------|
| 0          | 1-2     | Low             | 306/1081           | 1.0 (reference)          | 1.0 (reference)          |
| 0          | 0       | Low             | 387/874            | 1.6 (1.3-1.9)            | 1.4 (1.1-1.6)            |
| 1          | 1-2     | Low             | 260/342            | 2.7 (2.1-3.3)            | 3.2 (3.2-4.0)            |
| 1          | 0       | Low             | 254/242            | 3.7 (2.9-4.6)            | 4.2 (3.4-5.4)            |
| 2          | 1-2     | Low             | 58/31              | 6.6 (4.2-10.4)           | 8.5 (5.3-13.7)           |
| 2          | 0       | Low             | 53/25              | 7.5 (4.6-12.3)           | 8.8 (5.3-14.8)           |
| 0          | 1-2     | High            | 566/980            | 2.1 (1.8-2.5)            | 2.2 (1.8-2.6)            |
| 0          | 0       | High            | 908/767            | 4.3 (3.7-5.1)            | 4.2 (3.5-4.9)            |
| 1          | 1-2     | High            | 881/424            | 7.7 (6.5-9.2)            | 8.9 (7.4-10.8)           |
| 1          | 0       | High            | 1152/334           | 12.7 (10.6-15.2)         | 14.9 (12.4-18.3)         |
| 2          | 1-2     | High            | 208/52             | 14.7 (10.5-20.4)         | 17.8 (12.5-25.3)         |
| 2          | 0       | High            | 237/35             | 25.2 (17.3-36.8)         | 28.7 (19.3-42.7)         |

<sup>a</sup>number of exposed cases and controls; <sup>b</sup>adjusted for study, age, sex, residential area, and ancestry;

<sup>c</sup>adjusted for study, age, sex, residential area, ancestry, smoking, adolescent BMI, rs9277565, rs2229092, DRB1\*03:01, DRB1\*13:03, DRB1\*08:01, B\*44:02, B\*38:01, B\*55:01, DQA1\*01:01, DQB1\*03:02, and DQB1\*03:01. Homozygote correction for DRB1\*03:01 and A\*02:01.

**eTable 7.** OR with 95% CI of developing MS in subjects categorized by DRB1\*15:01, A\*02:01 status, and adolescent BMI.

| DRB1*15:01 | A*02:01 | Adolescent BMI | ca/co <sup>a</sup> | OR (95% CI) <sup>b</sup> | OR (95% CI) <sup>c</sup> |
|------------|---------|----------------|--------------------|--------------------------|--------------------------|
| 0          | 1-2     | <25            | 1021/2295          | 1.0 (reference)          | 1.0 (reference)          |
| 0          | 0       | <25            | 1563/1957          | 1.8 (1.6-2.0)            | 1.6 (1.5-1.8)            |
| 1          | 1-2     | <25            | 1248/864           | 3.2 (2.9-3.6)            | 3.6 (3.2-4.1)            |
| 1          | 0       | <25            | 1603/645           | 5.6 (5.0-6.3)            | 6.2 (5.4-7.2)            |
| 2          | 1-2     | <25            | 301/90             | 7.4 (5.8-9.5)            | 9.2 (7.0-12.1)           |
| 2          | 0       | <25            | 320/72             | 9.8 (7.5-12.9)           | 11.3 (8.4-15.2)          |
| 0          | 1-2     | ≥25            | 161/72             | 1.3 (1.1-1.7)            | 1.3 (1.0-1.6)            |
| 0          | 0       | ≥25            | 231/199            | 2.8 (2.2-3.4)            | 2.5 (2.0-3.1)            |
| 1          | 1-2     | ≥25            | 221/89             | 5.8 (4.5-7.5)            | 6.0 (4.6-8.0)            |
| 1          | 0       | ≥25            | 229/75             | 7.1 (5.4-9.4)            | 8.0 (6.0-10.7)           |
| 2          | 1-2     | ≥25            | 39/12              | 7.2 (3.7-13.8)           | 8.2 (4.1-16.2)           |
| 2          | 0       | ≥25            | 48/3               | 40.0 (12.4-129)          | 44.3 (13.5-145)          |

<sup>a</sup>number of exposed cases and controls; <sup>b</sup>adjusted for study, age, sex, residential area, and ancestry;

<sup>c</sup>adjusted for study, age, sex, residential area, ancestry, smoking, EBNA-1 status, rs9277565, rs2229092, DRB1\*03:01, DRB1\*13:03, DRB1\*08:01, B\*44:02, B\*38:01, B\*55:01, DQA1\*01:01, DQB1\*03:02, and DQB1\*03:01. Homozygote correction for DRB1\*03:01 and A\*02:01.
